# Supplementary material
Source: MDPI journal article supplement (https://www.mdpi.com/2073-4352/11/10/1215)
Supplement: s1 [file s1]

# Mesomorphic and Thermal Behavior of Symmetric Bent-Core Liquid Crystal Compounds Derived from Resorcinol and Isophthalic Acid

Catalina Ionica Ciobanu <sup>1</sup>, Iulian Berladean <sup>2</sup>, Elena-Luiza Epure <sup>2,\*</sup>, Aurel Simion <sup>2</sup>, Gabriela Lisa <sup>2</sup>, Yahia Boussoualem <sup>3</sup> and Irina Carlescu <sup>2,\*</sup>

<sup>1</sup> Institute of Interdisciplinary Research-CERNESIM Centre, Alexandru Ioan Cuza University of Iasi, 11 Carol I, 700506 Iasi, Romania; catalina.ciobanu@uaic.ro (C.I.C)

<sup>2</sup> “Cristofor Simionescu” Faculty of Chemical Engineering and Environmental Protection, “Gheorghe Asachi” Technical University, 700050 Iasi, Romania; iulian.berladean@gmail.com (I.B.); aurel.simion@tuiasi.ro (A.S.); gapreot@ch.tuiasi.ro (G.L.)

<sup>3</sup> Unité de Dynamique et Structure de Matériaux Moléculaires, Université du Littoral-Côte-d’Opale, 59140 Dunkerque, France; yahia.boussoualem@univ-littoral.fr (Y.B.)

\* Correspondence: icarlescu@ch.tuiasi.ro (I.C.); lepure@tuiasi.ro (E.-L.E.)

## Supplementary Materials

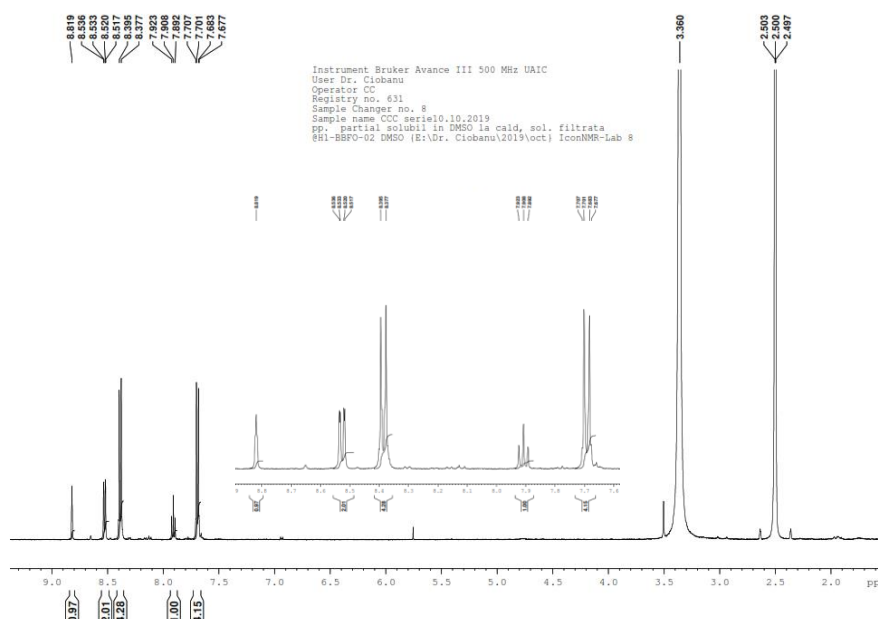

**Figure S1.** <sup>1</sup>H-NMR of 1,3-bis(4-nitrophenyl) isophthalate.

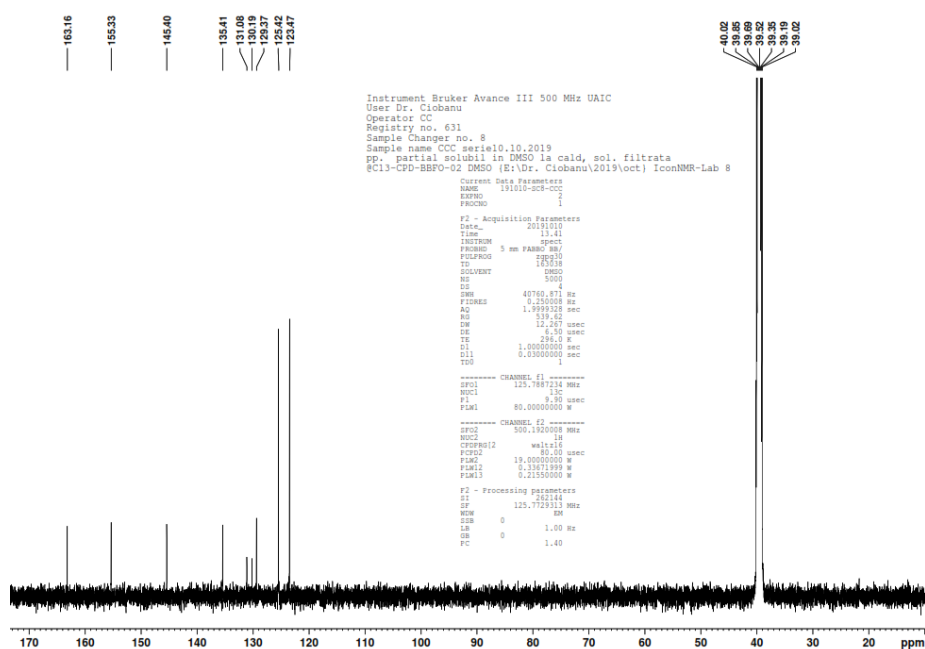Figure S2. <sup>13</sup>C-NMR of 1,3-bis(4-nitrophenyl) isophthalate.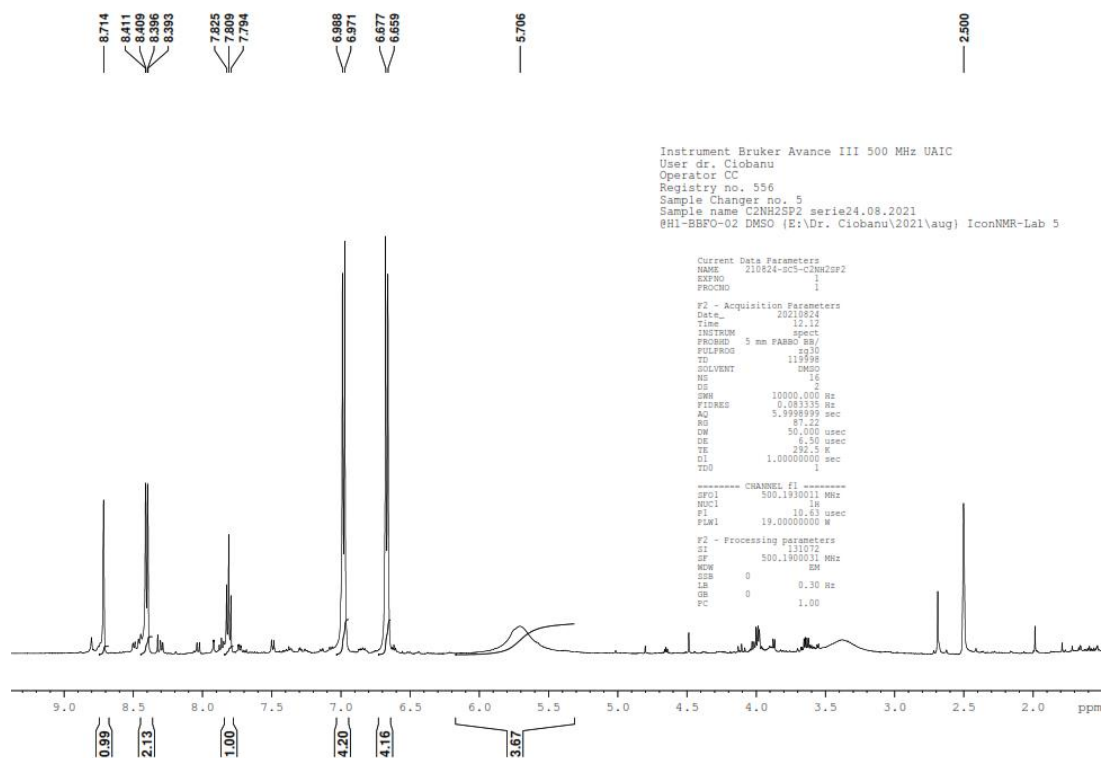Figure S3. <sup>1</sup>H-NMR of 1,3-bis(4-aminophenyl) isophthalate.

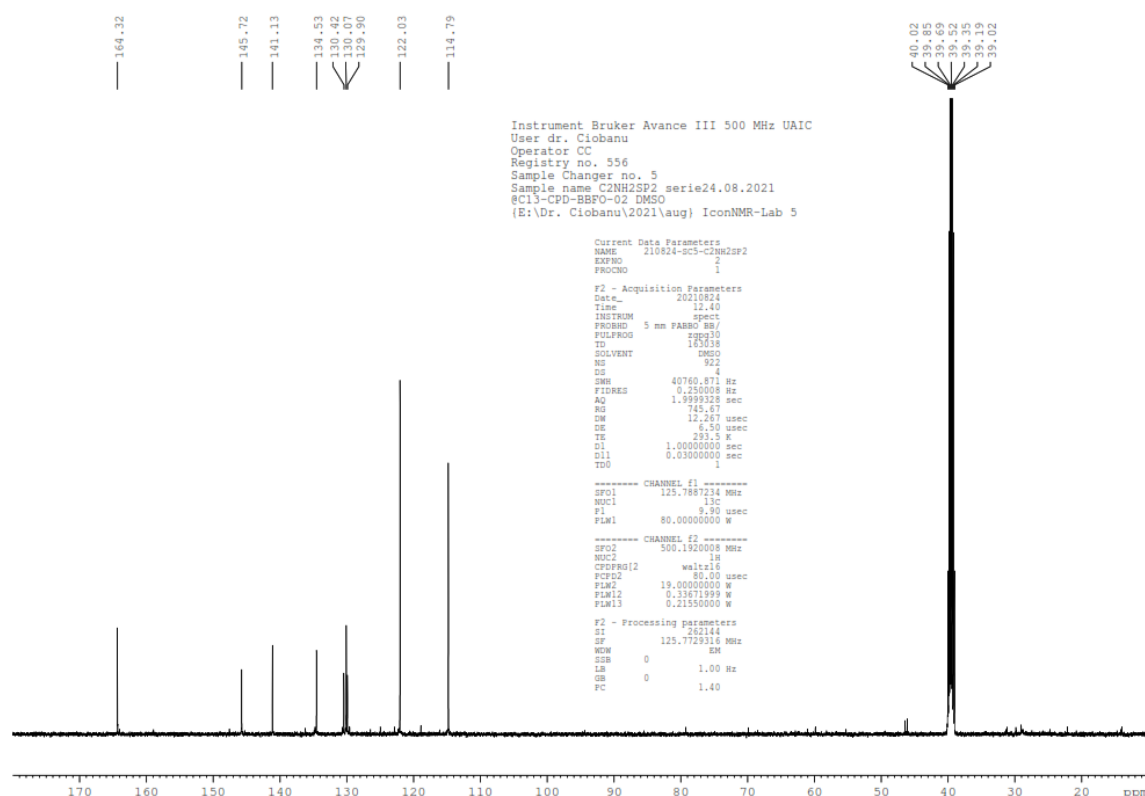Figure S4.  $^{13}\text{C}$ -NMR of 1,3-bis(4-aminophenyl) isophthalate.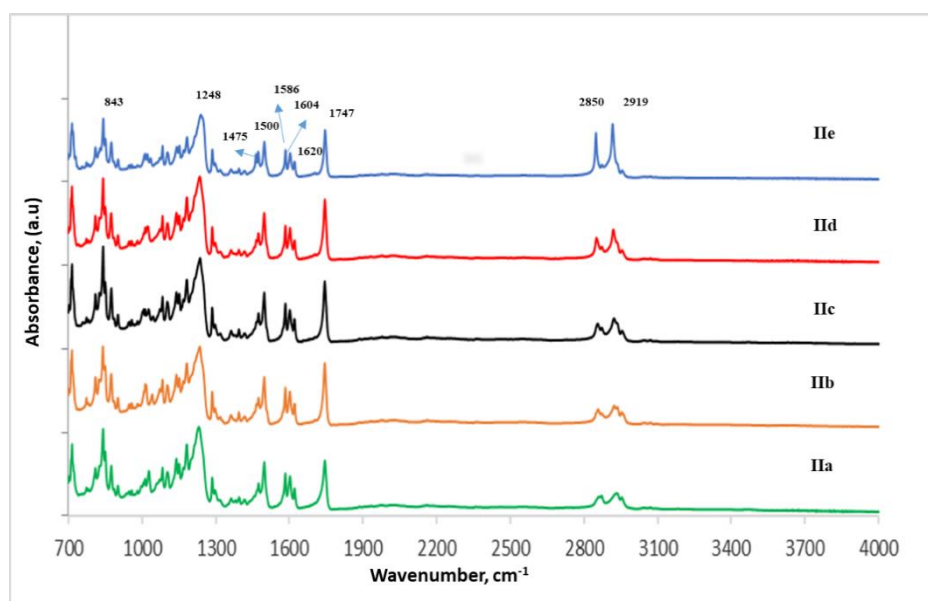

Figure S5. FT-IR spectra of final compounds IIa–IIe.

**Author Contributions:** Conceptualization, I.C. and Y.B.; methodology, I.B., A.S., I.C., C.I.C., E.-L.E. and G.L.; software, C.I.C., E.-L.E. and G.L.; investigation, I.C., Y.B., C.I.C., E.-L.E., G.L.; writing—original draft preparation, I.C. G.L and E.L.E., writing—review and editing, I.C., E.-L.E.; visualization, I.C.; supervision, I.C.; project administration, I.C.; funding acquisition, I.C.; All authors have read and agreed to the published version of the manuscript.”

**Funding:** This research was funded by the “Gheorghe Asachi” Technical University of Iasi, project number GI/P30/2021.

**Data Availability Statement:** All data generated or analyzed during this study are included in this published article and its additional files

**Acknowledgments:** Authors are also grateful to the CERNESIM Center of the Alexandru Ioan Cuza University of Iasi, for infrastructure used in registered NMR and FT-IR experiments.

**Conflicts of Interest:** The authors declare no conflict of interest.

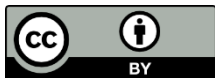

© 2020 by the authors. Submitted for possible open access publication under the terms and conditions of the Creative Commons Attribution (CC BY) license (<http://creativecommons.org/licenses/by/4.0/>).
